# Supplementary material for: Theoretical studies of the electronic properties of confined aromatic molecules in support of electronic confinement effectElectronic Supplementary Information (ESI) available: A general solution for the confined system. See http://www.rsc.org/suppdata/qu/b3/b307440d/
Source: Royal Society of Chemistry journal article supplement (doi:10.1039/b307440d), 2003-01-01
Supplement: b307440d.doc [file b307440d.doc]

**Supporting Information for *PhysChemComm***

#### Manuscript Title: **Theoretical studies of the electronic properties of confined aromatic molecules in support of electronic confinement effect**

Authors: Lei Z. Zhang and Peng Cheng

A general solution for the confined system

Considering a particle in the free system, the eigenfunctions should vanish at the infinitum. Solutions for the same system but confined close to a surface *S*, may be obtained by solving the same eigenfunction but imposing the solution being null at the surface *S*. Here,  is defined as a wave function of a given state for the free system and ’ the one of the equivalent state for the surface-confined system. The Schrodinger equations for this particle in these two conditions are written as

*H* = *E* (A1)

*H*’ = *E*’’ (A2)

where *H* is the one-particle Hamiltonian

*H* =  (*ħ*2 / 2*m*)2 + *V*(*x*)

Since the solution ’ is not necessarily quadratically integrable in all R3 but at a certain distance separated from the surface, we call the volume above the surface *V*. Therefore, we can define a new operator *H*’

*H*’*f*(*x*) = *f*(*x*), at *x*  *V*

= 0, at *x*  *V* (A3)

where *f*(*x*) is an arbitrary function.

Then we can write the following identity by taking account of the hermiticity of *H*

|*HH*’|’ = |*H*|*H*’’ = *E*|*H*’| (A4)

|*H*’*H*|’ = |*H*’|*H*’ = *E*’|*H*’| (A5)

From (A4) and (A5) we can obtain

*E* = *E*’  *E* =  |[*H*,*H*’]|’ / |*H*’|’ (A6)

where the square bracket indicates the operator commutator

[*H*,*H*’] = *HH*’  *H*’*H*

The denominator in Eq. A6 is simply the integration within the volume *V*,

|*H*’|’ = *V*d***(*x*)’(*x*) (A7)

where the star * indicates complex conjugation, whereas the numerator can be solved by using the second Green formula.

The Hamiltonian *H*, which contains the Laplacian operator may be developed as

|[*H*,*H*’]|’ =  (*ħ*2 / 2*m*){|2*H*’|’  |*H*’2|’} + |[*V*,*H*’]|’ (A8)

The last term in Eq. A8 vanishes because, being both local operators, *V* and *H*’ commute. Then, by applying the second Green formula it results that

|[*H*,*H*’]|’ =  (*ħ*2 / 2*m*){*V*d**(2*(*x*))’(*x*)  *V*d***(*x*)(2’(*x*))}

=  (*ħ*2 / 2*m*){*s*d*s*(N*)(*x*)’(*x*)  *s*d*s**(*x*)( N’)(*x*)} (A9)

where integration is along surface *S* and N denotes directional derivative respect to vector N. Notice that the first term in Eq. A9 must vanish because ’(*x*) is null in every point of surface *S* (boundary condition). Therefore, it leads to

(A10)

Taken the system pictured in the text,  being a molecular orbital for the unconfined ** system and ’ the equivalent one for the confined system, one can obtain the confinement energy *E* by applying Eq. A10

(A11)

Now, we are able to express Eq. A11 as a function of the *p*z atomic orbital of the carbon atom *a*(*x*,*y*,*z*) and its neighboring carbon atom *b*(*x*,*y*,*z*) for the unconfined molecule and *a*’(*x*,*y*,*z*) and *b*’(*x*,*y*,*z*) for the confined one. The energy splitting of the two molecular orbital states ** and *** is expressed as

(A12)

According to the HMO theory, the differential overlap, that is, the second term in the denominator should be null, which then leads to the expressions of ** and ** in the text.
